# Supplementary material
Source: publisher figshare collection journal article supplement (https://geolsoc.figshare.com/ndownloader/files/5423993)
Supplement: Supplementary file 1 [file 5423993]

Appendix 1. Summary of major and trace element chemistry in the five zones of Lake Texoma for summer, and fall and spring seasons (2003-2004)1
Zone	Samples	Sample size		Ba	Ca	Fe	K	Li	Mg	Mo	Na	Si	Sr	Al	V	Cr	Mn	Co	Rb	Ni	Cu	Zn	As	Cd	Cs	Pb	U	Tl	Se	F	Cl	Br	SO4	HCO3	TDS
				(?g/l)	(mg/l)	(?g/l)	(mg/l)	(?g/l)	(mg/ l)	(?g/l)	(mg/l)	(mg/l)	(mg/l)	(?g/l)	(?g/l)	(?g/l)	(?g/l)	(?g/l)	(?g/l)	(?g/l)	(?g/l)	(?g/l)	(?g/l)	(?g/l)	(?g/l)	(?g/l)	(?g/l)	(?g/l)	(?g/l)	(mg/l)	(mg/l)	(mg/l)	(mg/l)	(mg/l)	(mg/l)
1. RRZ	Summer	12	Mean	111.57	83.92	2.64	57.4	17.39	30.99	6.68	261.77	3.15	1.14	26.88	6.12	2.17	2.29	217	1.2	3.82	3.54	7.73	3.8	1.25	4.36	0.81	1.84	0.63	2.34	0.28	421.88	0.79	265.62	49.34	1129.77
			SD	2.49	1.77	0.5	1.3	0.98	0.85	1.7	5.89	0.52	0.02	2.84	0.45	1.1	2.85	9.89	0.02	0.66	0.25	0.54	0.46	4.01	2.66	0.61	0.11	1.88	0.47	0.02	10.87	0.07	3.44	12.44	22.34
	Fall & spring	9	Mean	106.49	91.25	1.27	41.65	16.71	28.74	10.23	202.48	1.42	1.09	56.55	3.51	2.02	2.23	226.45	1.1	3.52	0.12	5.57	2.12	2.34	9.15	0.28	2.44	-	2.05	0.26	399.38	0.81	263.91	73.34	1066.46
			SD	15.58	12.51	3.49	6.87	6.53	10.71	5.74	89.15	0.14	0.19	6.4	0.72	0.75	1.83	53.37	0.38	0.38	0.18	2.92	0.43	3.47	2	0.35	0.33	-	0.65	0.01	109.5	0.32	42.18	2.56	223.74
	All RR	21	Mean	109.39	87.06	2.05	50.65	17.1	30.02	8.2	236.36	2.46	1.12	39.6	5	2.1	2.27	221.05	1.16	3.69	2.07	6.81	3.08	1.71	6.41	0.58	2.1	-	2.12	0.27	410.63	0.79	264.76	59.62	1098.11
			SD	10.56	10.43	2.87	9.22	4.26	7.91	4.22	67.78	0.94	0.16	29.57	1.69	0.89	2.24	35.25	0.25	0.59	2.3	2.54	0.94	3.45	4.35	0.62	0.41	-	0.6	0.02	76.36	0.19	29.04	15.18	157.65
2. RRTZ	Summer	34	Mean	114.99	79.35	4.91	54.73	17.3	32.65	7.57	236.3	2.28	1.15	30.56	4.69	2.85	55.28	295.37	1.13	4.31	3.23	16.32	3.52	18.22	6.57	1.18	2.01	439.53	2.31	0.29	380.28	0.71	254.48	62.54	1055.59
			SD	6.41	6.22	13.21	3.04	1.16	1.07	3.95	25.98	0.59	0.07	42.46	0.94	0.73	150.55	96.97	0.07	0.93	1.86	12.02	0.82	74.93	11.1	2.3	0.15	2104.16	0.29	0.02	43.08	0.09	13.21	7.67	82.95
	Fall & spring		Mean	-	-	-	-	-	-	-	-	-	-	-	-	-	-	-	-	-	-	-	-	-	-	-	-	-	-	-	-	-	-	-	-
			SD	-	-	-	-	-	-	-	-	-	-	-	-	-	-	-	-	-	-	-	-	-	-	-	-	-	-	-	-	-	-	-	-
	All RRT		Mean	-	-	-	-	-	-	-	-	-	-	-	-	-	-	-	-	-	-	-	-	-	-	-	-	-	-	-	-	-	-	-	-
			SD	-	-	-	-	-	-	-	-	-	-	-	-	-	-	-	-	-	-	-	-	-	-	-	-	-	-	-	-	-	-	-	-
3. MLZ	Summer	61	Mean	115.81	78.66	8.59	48.43	16.3	33.03	9.28	205.34	2	1.06	20.82	4.6	2.43	63.44	251.62	1.06	5.21	3.01	9.93	3.25	8.58	4.18	0.79	2.16	673.41	2.23	0.28	321.48	0.66	244.84	66.52	960.4
			SD	8.57	7.47	20.11	3.92	1.44	1.27	6.45	19.86	0.56	0.12	20.14	1.11	0.74	148.25	83.99	0.06	3.31	3.08	3.83	0.95	31.83	3.83	1.85	0.18	2674.23	0.23	0.02	31.26	0.07	15.7	5.44	66.25
	Fall & spring	26	Mean	119.94	86.02	0.54	48.19	15.43	32.53	9.58	191.91	2.09	1.09	69.3	3.53	3.04	2.01	171.55	0.99	3.34	1.22	7.5	2.44	8.8	8.05	0.52	2.14	-	1.77	0.26	297.27	0.63	228.94	65.58	911.18
			SD	3.7	3.08	0.71	1.38	0.97	1.37	5.87	14.35	0.28	0.02	65.7	0.49	1.46	6.63	21.95	0.07	0.27	1.58	2.64	0.62	12.83	7.31	0.36	0.17	-	0.61	0.01	17.97	0.1	12.21	8.49	37.33
	All ML	87	Mean	117.04	80.86	6.19	48.36	16.04	32.88	9.37	201.33	2.03	1.07	35.31	4.28	2.61	45.08	227.7	1.04	4.65	2.47	9.21	3.01	8.65	5.33	0.71	2.15	-	2.05	0.27	314.24	0.65	240.09	66.23	945.34
			SD	7.67	7.29	17.21	3.36	1.37	1.32	6.25	19.32	0.49	0.1	45.12	1.08	1.04	127.07	80.13	0.07	2.9	2.84	3.68	0.94	27.47	5.38	1.57	0.18	-	0.48	0.02	30	0.08	16.4	6.49	62.97
4.WRTZ	Summer	35	Mean	114.27	79.39	9.37	46.99	15.04	32.96	9.46	186.1	2.44	1.01	13.84	4.23	2.29	67.49	280.21	1.05	6.51	4.1	8.63	3.21	7.46	4.29	0.8	2.1	317.2	2.34	0.28	283.87	0.62	235.03	64.51	891.02
			SD	8.94	6.55	23.38	3.18	1.7	0.73	5.84	24.44	0.64	0.11	17.49	1.21	0.66	143.08	87.58	0.09	3.6	2.67	1.82	0.73	11.72	4.11	2.72	0.3	1378.84	0.2	0.02	38.86	0.05	13.81	6.85	78.63
	Fall & spring	7	Mean	116.11	85.85	0.1	43.81	13.15	30.8	14.99	158.19	1.85	1.04	49.59	2.72	1.56	0.63	160.68	0.82	2.98	0.42	4.13	1.65	4.03	8.45	0.31	2.21	-	1.21	0.25	254.91	0.53	218.38	75.7	831.88
			SD	4.72	2.73	0.26	2.33	0.39	1.06	7.61	7.11	0.16	0.06	19.1	0.15	0.16	0.22	14.9	0.04	0.12	1.1	0.31	0.09	2.37	2.64	0.05	0.08	-	0.14	0	5.29	0.06	3.12	0.68	13.94
	All WRT	42	Mean	114.58	80.47	7.82	46.46	14.73	32.6	10.38	181.45	2.34	1.01	19.8	3.98	2.17	56.35	260.29	1.01	5.92	3.48	7.88	2.95	6.89	4.98	0.72	2.11	-	1.81	0.27	279.05	0.6	232.25	66.37	881.16
			SD	8.37	6.53	21.58	3.26	1.71	1.13	6.41	24.77	0.63	0.1	22.11	1.24	0.67	132.71	91.79	0.12	3.54	2.83	2.37	0.89	10.79	4.19	2.49	0.28	-	0.6	0.02	37.09	0.06	14.11	7.54	75.18
5.WRZ	Summer	21	Mean	113.76	72.03	24.75	46.79	12.64	32.03	7.43	131.44	3.32	0.93	26.61	4.74	2.5	68.54	321.52	1.00	7.16	4.25	10.01	3.37	1.41	3.69	0.85	1.86	70.65	-	0.29	192.42	0.61	207.83	61.47	705.08
			SD	6.39	7.06	49.22	1.63	1.9	2.7	3.03	28.67	0.82	0.08	59.8	0.95	0.69	178.24	103.74	0.1	3.2	1.61	8.26	1	3.74	7.48	1.21	0.3	222.21	-	0.02	43.59	0.27	38.72	5.85	112.71
	Fall & spring		Mean	-	-	-	-	-	-	-	-	-	-	-	-	-	-	-	-	-	-	-	-	-	-	-	-	-	-	-	-	-	-	-	-
			SD	-	-	-	-	-	-	-	-	-	-	-	-	-	-	-	-	-	-	-	-	-	-	-	-	-	-	-	-	-	-	-	-
	All WR		Mean	-	-	-	-	-	-	-	-	-	-	-	-	-	-	-	-	-	-	-	-	-	-	-	-	-	-	-	-	-	-	-	-
			SD	-	-	-	-	-	-	-	-	-	-	-	-	-	-	-	-	-	-	-	-	-	-	-	-	-	-	-	-	-	-	-	-
All lake summer		163	Mean	114.99	79.35	4.91	54.73	17.3	32.65	7.57	236.3	2.28	1.15	30.56	4.69	2.85	55.28	295.37	1133.37	1.13	3.23	16.32	3.52	18.22	6.57	1.18	2.01	439.53	2.31	0.29	380.28	0.71	254.48	62.54	1055.59
			SD	6.41	6.22	13.21	3.04	1.16	1.07	3.95	25.98	0.59	0.07	42.46	0.94	0.73	150.55	96.97	73.11	0.07	1.86	12.02	0.82	74.93	11.1	2.3	0.15	2104.16	0.29	0.02	43.08	0.09	13.21	7.67	82.95
All lake fall & spring		42	Mean	116.42	87.11	0.63	46.06	15.32	31.43	10.62	188.56	1.92	1.08	63.28	3.39	2.57	1.83	181.51	984.68	0.98	0.85	6.52	2.24	6.62	8.35	0.43	2.21	-	1.73	0.26	312.09	0.64	234.67	68.93	931.24
			SD	9.43	6.42	1.71	4.35	3.22	5.14	6.35	43.92	0.36	0.09	53.14	0.59	1.35	5.33	38.71	197.46	0.2	1.41	2.8	0.6	10.66	5.95	0.34	0.24	-	0.63	0.01	70.81	0.16	26.54	8.13	129.88
ALL lake		205	Mean	115.08	80.26	7.79	49.1	15.74	32.4	8.96	199.48	2.31	1.06	30.89	4.41	2.5	47.1	254.53	1056	1.06	2.95	9.95	3.13	8.42	5.41	0.79	2.09	-	2.04	0.28	314.57	0.66	239.88	64.48	940.31
			SD	8.11	8.05	22.81	4.97	2.36	2.96	5.57	42.8	0.73	0.12	41.57	1.19	0.91	131.96	90.92	127.7	0.13	2.6	6.81	0.93	35.76	6.61	1.83	0.26	-	0.52	0.02	70.52	0.13	24.62	8.43	135.06
ANOVA		Zone	F	0.82	8.89	1.83	37.5	35.97	2.82	1.39	84.97	19.32	24.54	0.87	6.63	3.5	0.62	4.88	12.28	5.62	1.61	5.75	1.63	0.79	1.1	0.23	8.87	0.43	0.52	2.47	97.23	5.48	23.14	15.05	77.79
			P	NS	<0.001	NS	<0.001	<0.001	0.028	NS	<0.001	<0.001	<0.001	NS	<0.001	0.009	NS	0.001	<0.001	<0.001	NS	<0.001	NS	NS	NS	NS	<0.001	NS	NS	0.048	<0.001	<0.001	<0.001	<0.001	<0.001
		Season	F	1	41.61	5.88	3.52	2.94	2.39	2.05	1.25	12.2	6.79	54.49	37.82	1.6	6.85	32.51	13.24	17.58	30.61	23.78	54.63	0.04	24.43	1.27	6.13	-	28.75	17.32	0.61	0.68	0.11	5.18	0.23
			P	NS	<0.001	0.017	NS	0.089	NS	NS	NS	0.001	0.01	<0.001	<0.001	NS	0.01	<0.001	<0.001	<0.001	<0.001	<0.001	<0.001	NS	<0.001	NS	0.014	-	<0.001	<0.001	NS	PS	PS	0.025	NS
1Averages are for all depths in the respective zone, per season
Abbreviations: RRZ-Red River Zone; RRTZ-Red River Transition Zone; MLZ-Main Lake Zone; WRTZ-Washita River Transition Zone; WRZ-Washita River Zone. In ANOVA, RRZ, MLZ and WRTZ were examined for seasonal variations, and only summer samples were examined for variations among zones. Results of Tukey� s post-hoc test in area ANOVA for significant differences among zones (numbers were codes for five zo…
